# Supplementary material for: Hypoxic Extracellular Matrix Preserves Its Competence after Expansion of Human MSCs under Physiological Hypoxia In Vitro
Source: MDPI journal article supplement (doi:10.3390/biomimetics8060476), 2023-10-07
Supplement: s1 [file s1]

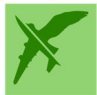

**Table S1.** Paracrine activity of MSCs recellularized on collagen/dcECM-N/dcECM-Hyp

| Cytokine     | Collagen             | DcECM-N           | DcECM-Hyp         |
|--------------|----------------------|-------------------|-------------------|
|              | Concentration, pg/ml |                   |                   |
| EGF          | 5.86 ± 2.36          | 5.69 ± 2.20       | 5.23 ± 2.08       |
| FGF-2        | 95.97 ± 89.67        | 164.47 ± 109.6    | 103.182 ± 81.47   |
| Eotaxin      | 104.44 ± 73.42       | 141.65 ± 51       | 240.62 ± 118.87   |
| TGF-A        | ND                   | ND                | ND                |
| G-CSF        | 237.18 ± 330.33      | 461.9825 ± 530.96 | 300.49 ± 334.60   |
| Fit3L        | 7.81 ± 2.086         | 7.76 ± 3.79       | 9.23 ± 2.68       |
| GM-CSF       | 80.63 ± 9.34         | 291.275 ± 334.28  | 46.24 ± 51.85     |
| Fractalkine  | 111.57 ± 81.66       | 164.59 ± 182.72   | 99 ± 51           |
| IFNa2        | 20.24 ± 7.96         | 21.21 ± 10.26     | 24.29 ± 10.13     |
| IFN $\gamma$ | ND                   | ND                | ND                |
| GRO          | 295.69 ± 283.87      | 634.2 ± 403.4     | 1009.43 ± 704.48  |
| IL-10        | 0                    | 0                 | 0                 |
| MCP-3        | 208.22 ± 203.79      | 227.63 ± 239.89   | 220.57 ± 185.67   |
| IL-12p40     | 2.85 ± 2.04          | 3.27 ± 1.64       | 3.31 ± 1.98       |
| MDC          | 19.14 ± 8.21         | 27.85 ± 16.81     | 27.88 ± 13.19     |
| IL-12p70     | ND                   | ND                | ND                |
| PDGF-AA      | ND                   | ND                | ND                |
| IL-13        | ND                   | ND                | ND                |
| PDGF-AB/BB   | 36.29 ± 6            | 41.54 ± 9.22      | 38.42 ± 6.91      |
| IL-15        | 4.14 ± 1.31          | 4.57 ± 2.68       | 4.87 ± 2.51       |
| sCD40L       | 18.83 ± 13.17        | 17.48 ± 2.68      | 14.71 ± 5.10      |
| IL17-A       | ND                   | ND                | ND                |
| IL-1RA       | 2.84 ± 1.59          | 5.25 ± 4.79       | 3.44 ± 1.77       |
| IL-1A        | ND                   | ND                | ND                |
| IL-9         | ND                   | ND                | ND                |
| IL-1B        | ND                   | ND                | ND                |
| IL-2         | ND                   | ND                | ND                |
| IL-3         | ND                   | ND                | ND                |
| IL-4         | 76.725 ± 69.17       | 82.18 ± 77.18     | 78.34 ± 61.55     |
| IL-5         | ND                   | ND                | ND                |
| IL-6         | 3602.75 ± 1693.58    | 4070 ± 856.21     | 4117.5 ± 1092.41  |
| IL-7         | 7.43 ± 1.86          | 7.76 ± 1.83       | 8.07 ± 1.71       |
| IL-8         | 56.91 ± 28.94        | 173.85 ± 76.1     | 307.9 ± 120.73    |
| IP-10        | 4278.13 ± 7169.52    | 3075 ± 3476.06    | 3343.42 ± 4219.62 |
| MCP-1        | 6568.25 ± 2084.44    | 6612.25 ± 2566.37 | 8435.75 ± 879.45  |
| MIP-1a       | 11.61 ± 3.25         | 16.92 ± 16.84     | 12.93 ± 13.68     |
| MIP-1b       | ND                   | ND                | ND                |
| RANTES       | 1628.74 ± 2504.23    | 1344.18 ± 1500.75 | 1573.18 ± 1738.53 |
| TNFa         | ND                   | ND                | ND                |
| TNFb         | ND                   | ND                | ND                |
| VEGF         | ND                   | ND                | ND                |

\* Data are presented as mean±SD (n=6). ND (no detected) – cytokines, the level of which was higher (VEGF) or lower (others) than the sensitivity of the assay.
